# Supplementary material for: A series of metal–organic coordination polymers containing multiple chiral centers
Source: Royal Society of Chemistry journal article supplement (doi:10.1039/c0ce00633e), 2010-11-24
Supplement: c0ce00633e.pdf [file c0ce00633e.pdf]

**A series of metal–organic coordination polymers containing multiple chiral centers**

Xiu-Li Yang,<sup>1</sup> Ming-Hua Xie,<sup>1</sup> Chao Zou,<sup>1</sup> Fei-Fei Sun<sup>1</sup> and Chuan-De Wu<sup>1,2\*</sup>

<sup>1</sup>Department of Chemistry, Zhejiang University, Hangzhou 310027, P. R. China

<sup>2</sup>State Key Laboratory of Structural Chemistry, Chinese Academy of Sciences, Fuzhou 350002, P. R. China, Email: [cdwu@zju.edu.cn](mailto:cdwu@zju.edu.cn)

**Table S1.** Selected bond lengths (Å) and angles (°) for **1-6**.

| Bond lengths             | (Å)        | Bond angles                    | (°)       | Bond angles                    | (°)       |
|--------------------------|------------|--------------------------------|-----------|--------------------------------|-----------|
| 1                        |            |                                |           |                                |           |
| Zn(1)-O(6)               | 2.082(2)   | O(6)-Zn(1)-N(1) <sup>i</sup>   | 93.2(1)   | O(1)-Zn(1)-O(3)                | 89.0(1)   |
| Zn(1)-N(1) <sup>i</sup>  | 2.084(2)   | O(6)-Zn(1)-O(1)                | 166.3(1)  | O(5)-Zn(1)-O(3)                | 177.8(1)  |
| Zn(1)-O(1)               | 2.107(2)   | N(1) <sup>i</sup> -Zn(1)-O(1)  | 100.5(1)  | O(6)-Zn(1)-N(2)                | 90.3(1)   |
| Zn(1)-O(5)               | 2.156(3)   | O(6)-Zn(1)-O(5)                | 87.5(1)   | N(1) <sup>i</sup> -Zn(1)-N(2)  | 169.6(1)  |
| Zn(1)-O(3)               | 2.163(3)   | N(1) <sup>i</sup> -Zn(1)-O(5)  | 92.7(1)   | O(1)-Zn(1)-N(2)                | 76.5(1)   |
| Zn(1)-N(2)               | 2.174(3)   | O(1)-Zn(1)-O(5)                | 90.6(1)   | O(5)-Zn(1)-N(2)                | 97.2(1)   |
|                          |            | O(6)-Zn(1)-O(3)                | 93.4(1)   | O(3)-Zn(1)-N(2)                | 84.8(1)   |
|                          |            | N(1) <sup>i</sup> -Zn(1)-O(3)  | 85.2(1)   |                                |           |
| 2                        |            |                                |           |                                |           |
| Co(1)-O(6)               | 2.0681(19) | O(6)-Co(1)-O(1)                | 165.78(8) | O(3)-Co(1)-O(5)                | 177.00(8) |
| Co(1)-O(1)               | 2.0788(19) | O(6)-Co(1)-O(3)                | 94.10(9)  | N(2) <sup>i</sup> -Co(1)-O(5)  | 90.82(8)  |
| Co(1)-O(3)               | 2.106(2)   | O(1)-Co(1)-O(3)                | 90.53(8)  | O(6)-Co(1)-N(1)                | 89.94(8)  |
| Co(1)-N(2) <sup>i</sup>  | 2.1103(19) | O(6)-Co(1)-N(2) <sup>i</sup>   | 93.01(8)  | O(1)-Co(1)-N(1)                | 76.97(8)  |
| Co(1)-O(5)               | 2.172(2)   | O(1)-Co(1)-N(2) <sup>i</sup>   | 100.70(8) | O(3)-Co(1)-N(1)                | 85.93(8)  |
| Co(1)-N(1)               | 2.176(2)   | O(3)-Co(1)-N(2) <sup>i</sup>   | 86.25(8)  | N(2) <sup>i</sup> -Co(1)-N(1)  | 171.82(9) |
|                          |            | O(6)-Co(1)-O(5)                | 86.70(8)  | O(5)-Co(1)-N(1)                | 96.96(8)  |
|                          |            | O(1)-Co(1)-O(5)                | 89.37(8)  |                                |           |
| 3                        |            |                                |           |                                |           |
| Zn(1)-O(2) <sup>ii</sup> | 1.9539(16) | O(2) <sup>ii</sup> -Zn(1)-O(6) | 112.23(9) | O(5)-Zn(1)-N(1)                | 97.65(8)  |
| Zn(1)-O(6)               | 1.9922(19) | O(2) <sup>ii</sup> -Zn(1)-O(5) | 97.15(7)  | O(2) <sup>ii</sup> -Zn(1)-O(3) | 96.40(7)  |
| Zn(1)-O(5)               | 2.110(2)   | O(6)-Zn(1)-O(5)                | 86.76(9)  | O(6)-Zn(1)-O(3)                | 86.00(8)  |
| Zn(1)-N(1)               | 2.1165(18) | O(2) <sup>ii</sup> -Zn(1)-N(1) | 116.12(7) | O(5)-Zn(1)-O(3)                | 166.26(6) |
| Zn(1)-O(3)               | 2.118(2)   | O(6)-Zn(1)-N(1)                | 130.36(9) | N(1)-Zn(1)-O(3)                | 78.35(8)  |
| 4                        |            |                                |           |                                |           |

|                           |          |                                |            |                                               |            |
|---------------------------|----------|--------------------------------|------------|-----------------------------------------------|------------|
| Ni(1)-O(3)                | 2.045(4) | O(3)-Ni(1)-O(1)                | 91.47(16)  | O(5)-Ni(1)-O(4) <sup>iv</sup>                 | 89.06(14)  |
| Ni(1)-O(1)                | 2.056(3) | O(3)-Ni(1)-O(5)                | 88.56(15)  | N(2) <sup>iii</sup> -Ni(1)-O(4) <sup>iv</sup> | 91.34(17)  |
| Ni(1)-O(5)                | 2.079(3) | O(1)-Ni(1)-O(5)                | 172.74(14) | O(3)-Ni(1)-N(1)                               | 85.78(14)  |
| Ni(1)-N(2) <sup>iii</sup> | 2.082(3) | O(3)-Ni(1)-N(2) <sup>iii</sup> | 89.44(17)  | O(1)-Ni(1)-N(1)                               | 81.98(14)  |
| Ni(1)-O(4) <sup>iv</sup>  | 2.087(4) | O(1)-Ni(1)-N(2) <sup>iii</sup> | 93.37(15)  | O(5)-Ni(1)-N(1)                               | 90.78(14)  |
| Ni(1)-N(1)                | 2.093(4) | O(5)-Ni(1)-N(2) <sup>iii</sup> | 93.90(15)  | N(2) <sup>iii</sup> -Ni(1)-N(1)               | 173.22(19) |
|                           |          | O(3)-Ni(1)-O(4) <sup>iv</sup>  | 177.54(15) | O(4) <sup>iv</sup> -Ni(1)-N(1)                | 93.64(14)  |
|                           |          | O(1)-Ni(1)-O(4) <sup>iv</sup>  | 90.81(14)  |                                               |            |

**5**

|                           |          |                               |            |                                                |            |
|---------------------------|----------|-------------------------------|------------|------------------------------------------------|------------|
| Cd(1)-O(2) <sup>v</sup>   | 2.263(3) | O(2) <sup>v</sup> -Cd(1)-O(9) | 89.35(11)  | O(8) <sup>vi</sup> -Cd(2)-O(3)                 | 100.01(11) |
| Cd(1)-O(9)                | 2.306(3) | O(2) <sup>v</sup> -Cd(1)-N(2) | 115.83(13) | O(8) <sup>vi</sup> -Cd(2)-N(4)                 | 111.22(13) |
| Cd(1)-N(2)                | 2.340(4) | O(9)-Cd(1)-N(2)               | 104.86(13) | O(3)-Cd(2)-N(4)                                | 95.07(12)  |
| Cd(1)-O(5)                | 2.346(3) | O(2) <sup>v</sup> -Cd(1)-O(5) | 81.59(12)  | O(8) <sup>vi</sup> -Cd(2)-O(1) <sup>vii</sup>  | 82.35(12)  |
| Cd(1)-O(7)                | 2.364(3) | O(9)-Cd(1)-O(5)               | 85.11(11)  | O(3)-Cd(2)-O(1) <sup>vii</sup>                 | 99.26(11)  |
| Cd(1)-N(3)                | 2.389(4) | N(2)-Cd(1)-O(5)               | 159.49(12) | N(4)-Cd(2)-O(1) <sup>vii</sup>                 | 158.26(12) |
| Cd(2)-O(8) <sup>vi</sup>  | 2.213(3) | O(2) <sup>v</sup> -Cd(1)-O(7) | 159.11(12) | O(8) <sup>vi</sup> -Cd(2)-N(1) <sup>vii</sup>  | 92.69(12)  |
| Cd(2)-O(3)                | 2.310(3) | O(9)-Cd(1)-O(7)               | 75.67(11)  | O(3)-Cd(2)-N(1) <sup>vii</sup>                 | 162.48(11) |
| Cd(2)-N(4)                | 2.328(4) | N(2)-Cd(1)-O(7)               | 82.56(12)  | N(4)-Cd(2)-N(1) <sup>vii</sup>                 | 91.47(12)  |
| Cd(2)-O(1) <sup>vii</sup> | 2.362(3) | O(5)-Cd(1)-O(7)               | 82.68(11)  | O(1) <sup>vii</sup> -Cd(2)-N(1) <sup>vii</sup> | 70.36(11)  |
| Cd(2)-N(1) <sup>vii</sup> | 2.377(3) | O(2) <sup>v</sup> -Cd(1)-N(3) | 105.40(12) | O(8) <sup>vi</sup> -Cd(2)-O(4)                 | 150.36(12) |
| Cd(2)-O(4)                | 2.476(3) | O(9)-Cd(1)-N(3)               | 148.79(12) | O(3)-Cd(2)-O(4)                                | 54.56(10)  |
|                           |          | N(2)-Cd(1)-N(3)               | 93.39(13)  | N(4)-Cd(2)-O(4)                                | 88.18(13)  |
|                           |          | O(5)-Cd(1)-N(3)               | 70.49(12)  | O(1) <sup>vii</sup> -Cd(2)-O(4)                | 86.92(12)  |
|                           |          | O(7)-Cd(1)-N(3)               | 82.02(12)  | N(1) <sup>vii</sup> -Cd(2)-O(4)                | 109.58(12) |

**6**

|                            |          |                                                |            |                                               |            |
|----------------------------|----------|------------------------------------------------|------------|-----------------------------------------------|------------|
| Cd(1)-N(2) <sup>viii</sup> | 2.320(4) | N(2) <sup>viii</sup> -Cd(1)-O(1) <sup>ix</sup> | 164.35(13) | O(1) <sup>ix</sup> -Cd(1)-O(2) <sup>ix</sup>  | 54.94(12)  |
| Cd(1)-O(1) <sup>ix</sup>   | 2.338(3) | N(2) <sup>viii</sup> -Cd(1)-N(1)               | 98.76(12)  | N(1)-Cd(1)-O(2) <sup>ix</sup>                 | 135.32(12) |
| Cd(1)-N(1)                 | 2.364(4) | O(1) <sup>ix</sup> -Cd(1)-N(1)                 | 96.86(12)  | O(3)-Cd(1)-O(2) <sup>ix</sup>                 | 77.49(11)  |
| Cd(1)-O(3)                 | 2.387(3) | N(2) <sup>viii</sup> -Cd(1)-O(3)               | 89.89(13)  | O(4) <sup>x</sup> -Cd(1)-O(2) <sup>ix</sup>   | 83.28(12)  |
| Cd(1)-O(4) <sup>x</sup>    | 2.389(3) | O(1) <sup>viii</sup> -Cd(1)-O(3)               | 96.09(12)  | N(2) <sup>viii</sup> -Cd(1)-O(3) <sup>x</sup> | 93.09(13)  |
| Cd(1)-O(2) <sup>ix</sup>   | 2.410(4) | N(1)-Cd(1)-O(3)                                | 71.66(12)  | O(1) <sup>ix</sup> -Cd(1)-O(3) <sup>x</sup>   | 88.46(12)  |
| Cd(1)-O(3) <sup>x</sup>    | 2.611(3) | N(2) <sup>viii</sup> -Cd(1)-O(4) <sup>x</sup>  | 84.65(13)  | N(1)-Cd(1)-O(3) <sup>x</sup>                  | 80.18(12)  |
|                            |          | O(1) <sup>ix</sup> -Cd(1)-O(4) <sup>x</sup>    | 84.07(12)  | O(3)-Cd(1)-O(3) <sup>x</sup>                  | 151.80(3)  |
|                            |          | N(1)-Cd(1)-O(4) <sup>x</sup>                   | 132.12(12) | O(4) <sup>x</sup> -Cd(1)-O(3) <sup>x</sup>    | 51.96(11)  |
|                            |          | O(3)-Cd(1)-O(4) <sup>x</sup>                   | 156.13(11) | O(2) <sup>ix</sup> -Cd(1)-O(3) <sup>x</sup>   | 126.24(12) |
|                            |          | N(2) <sup>viii</sup> -Cd(1)-O(2) <sup>ix</sup> | 112.88(13) |                                               |            |

Symmetry transformations used to generate equivalent atoms: i) x+1, y, z; ii) x-1, y-1, z-1; iii) x, y, z+1; iv) -x+2, y+1/2, -z+1; v) x-1, y, z; vi) -x+1/2, -y-1, z+1/2; vii) x-1/2, -y-3/2, -z; viii) -x+1/2, -y-1, z+1/2; ix) x-1, y, z; x) -x, y+1/2, -z-1/2.

Figures:

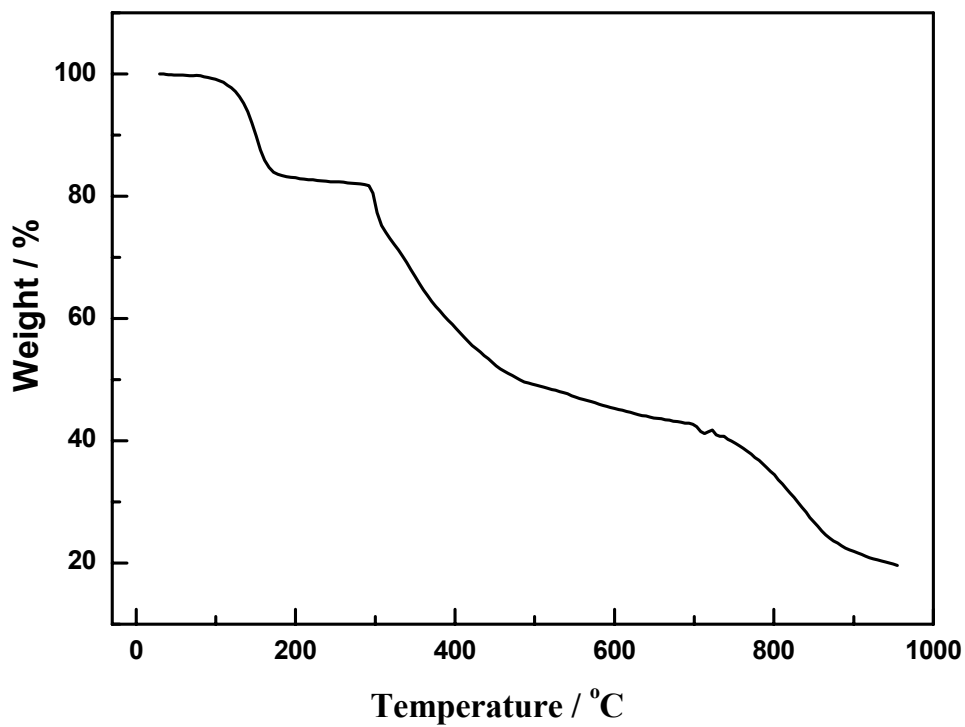

Fig. S1. TG result of 1.

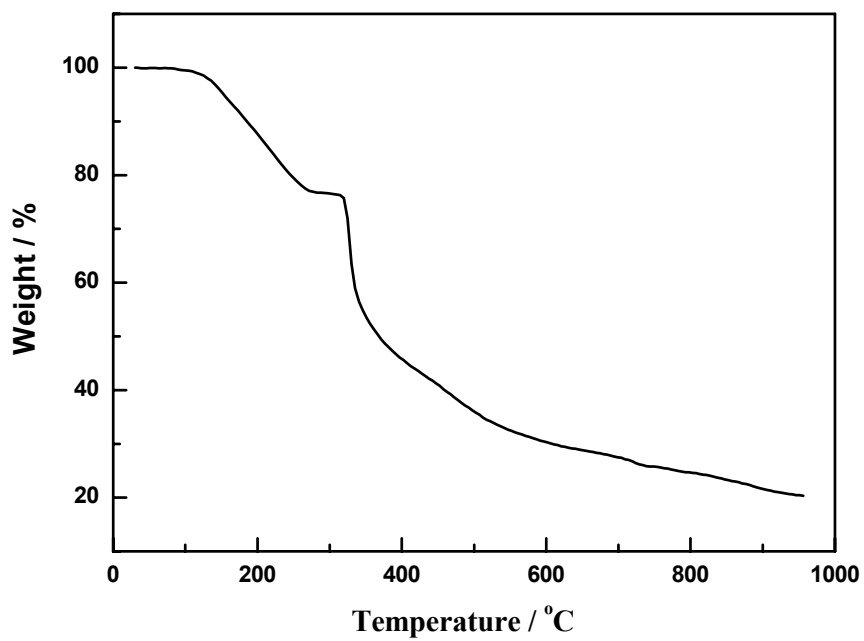

Fig. S2. TG result of 2.

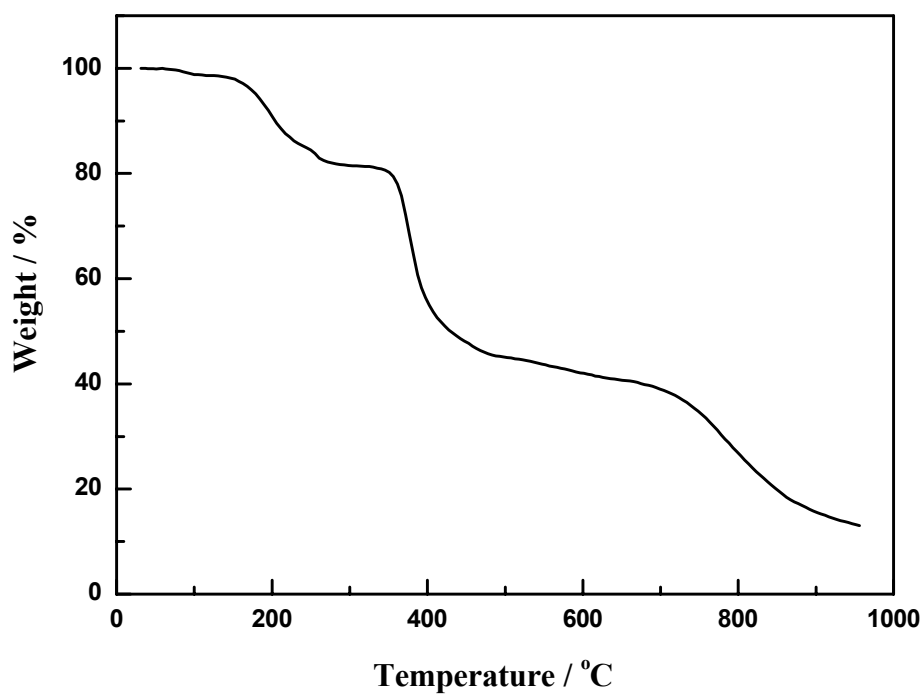

Fig. S3. TG result of 3.

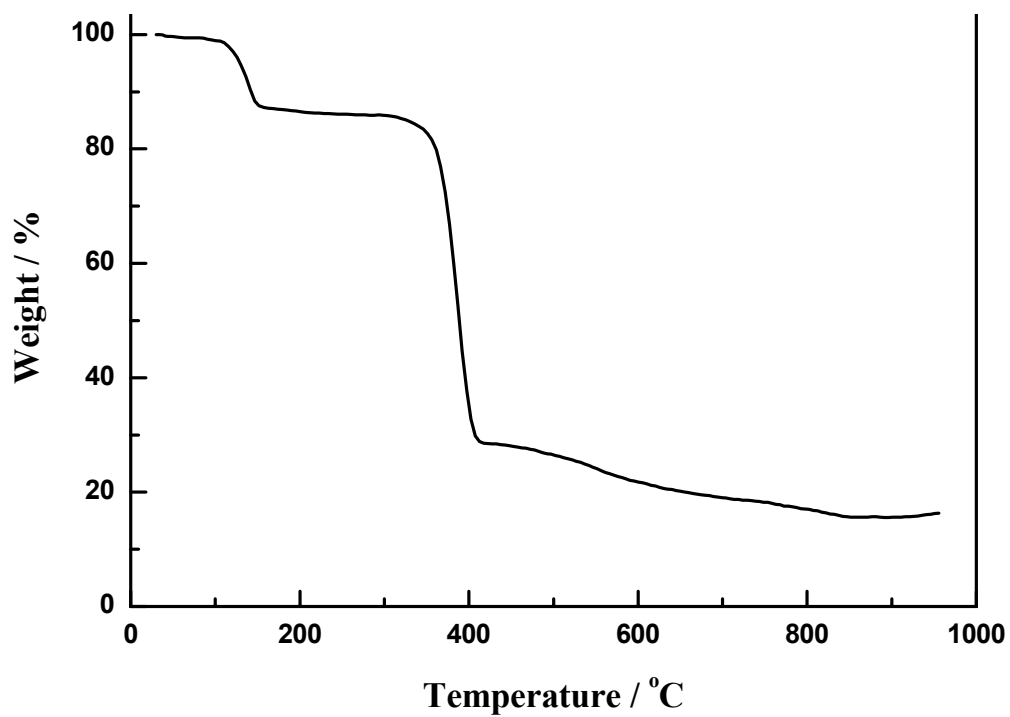

Fig. S4. TG result of 4.

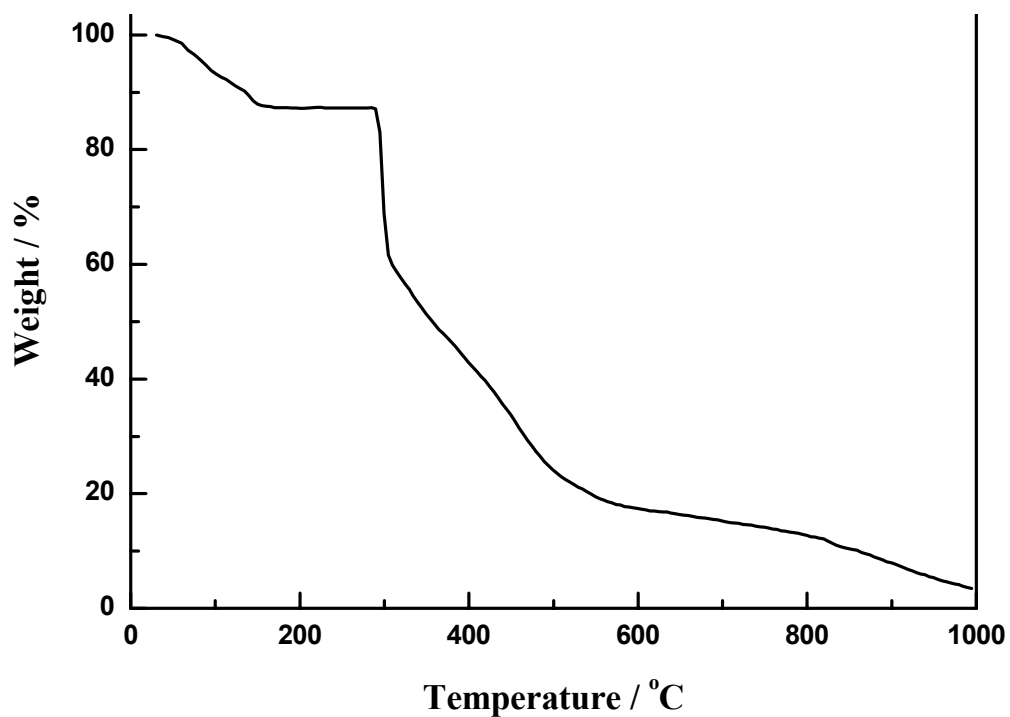

Fig. S5. TG result of 5.

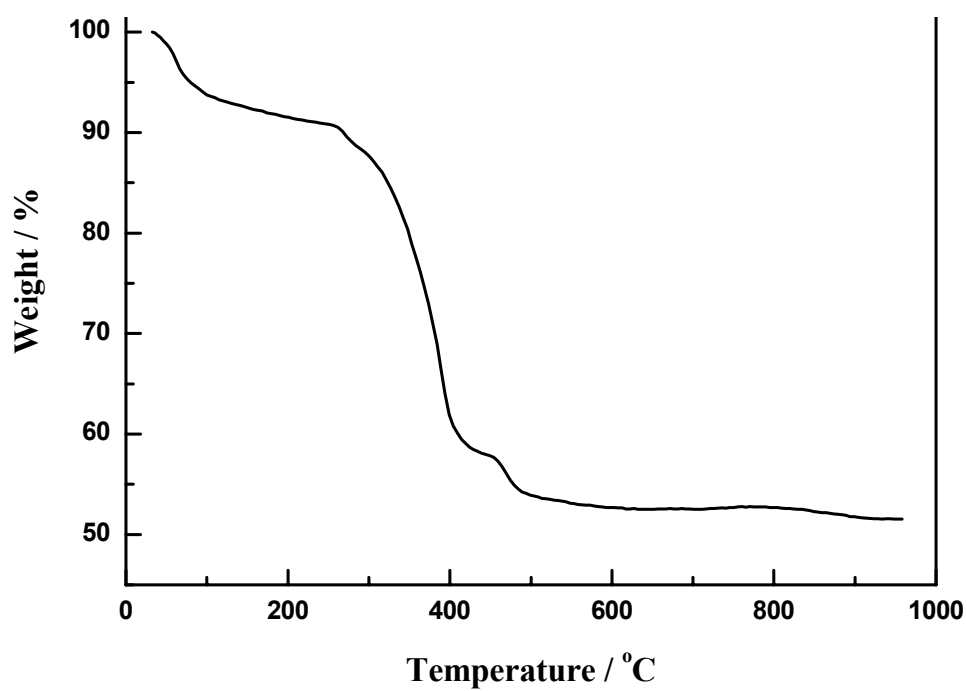

Fig. S6. TG result of 6.

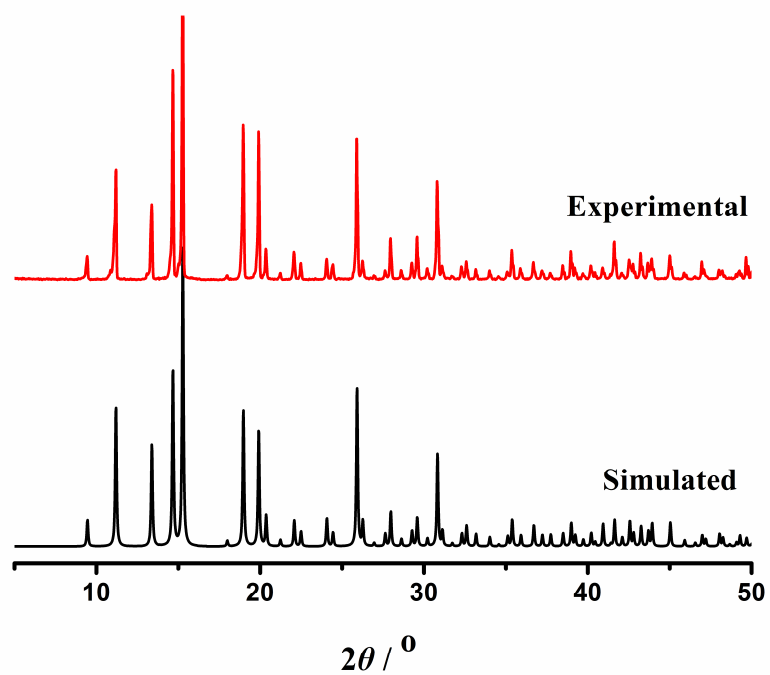

**Fig. S7.** The simulated and experimental XRPD patterns for 1.

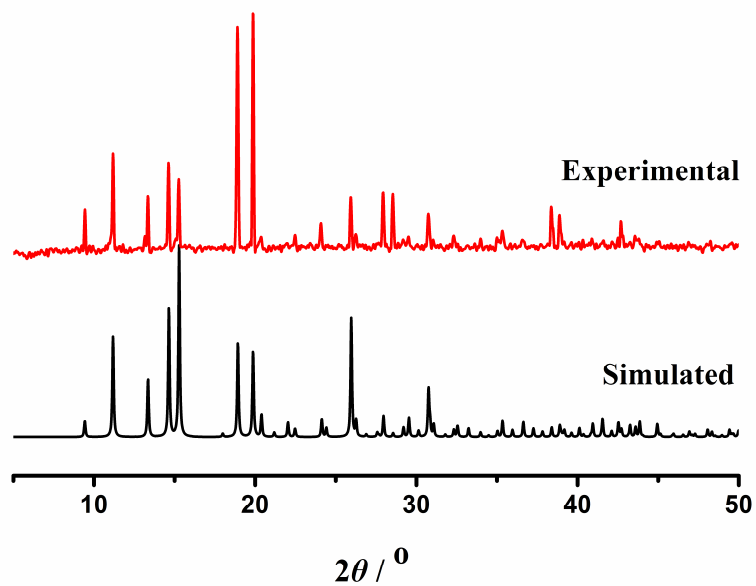

**Fig. S8.** The simulated and experimental XRPD patterns for 2.

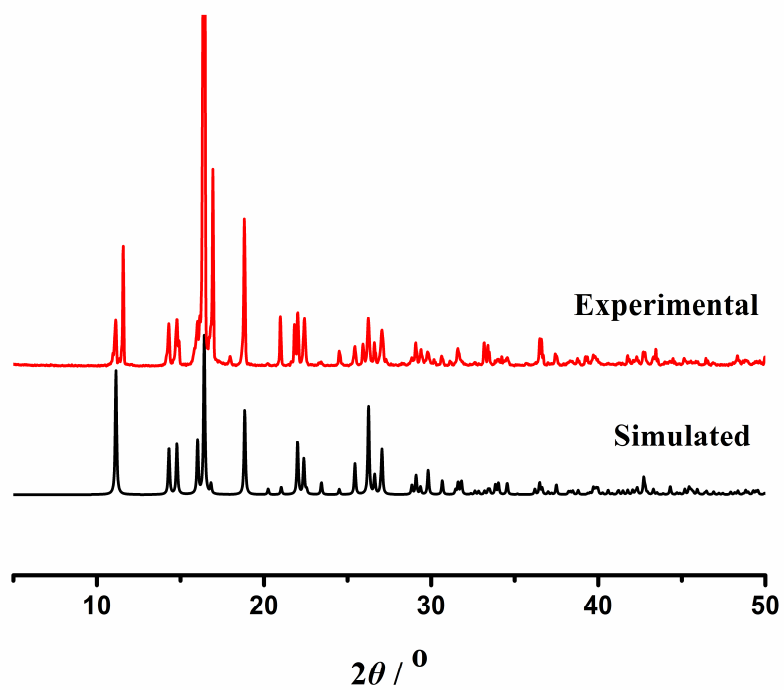

**Fig. S9.** The simulated and experimental RXP patterns for 3.

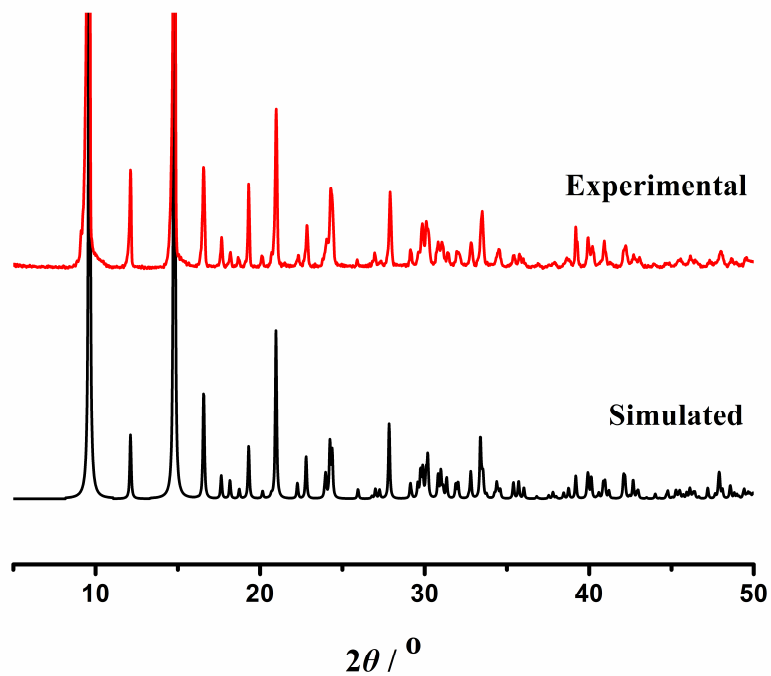

**Fig. S10.** The simulated and experimental RXP patterns for 4.

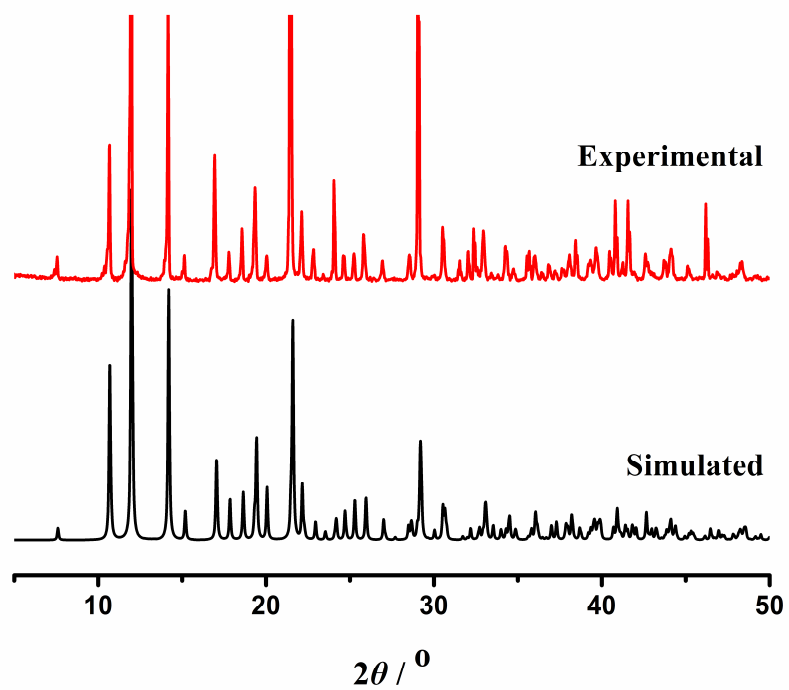

**Fig. S11.** The simulated and experimental XRPD patterns for **5**.

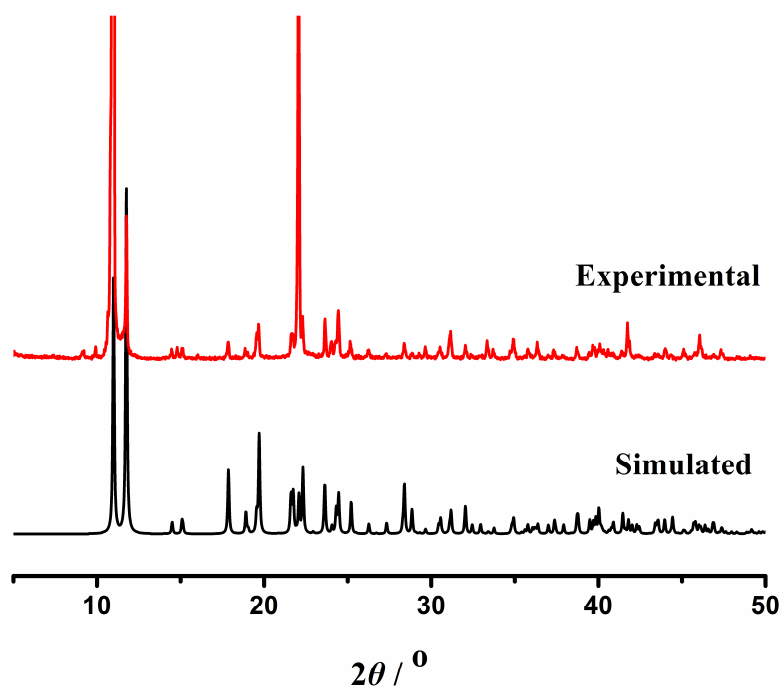

**Fig. S12.** The simulated and experimental XRPD patterns for **6**.



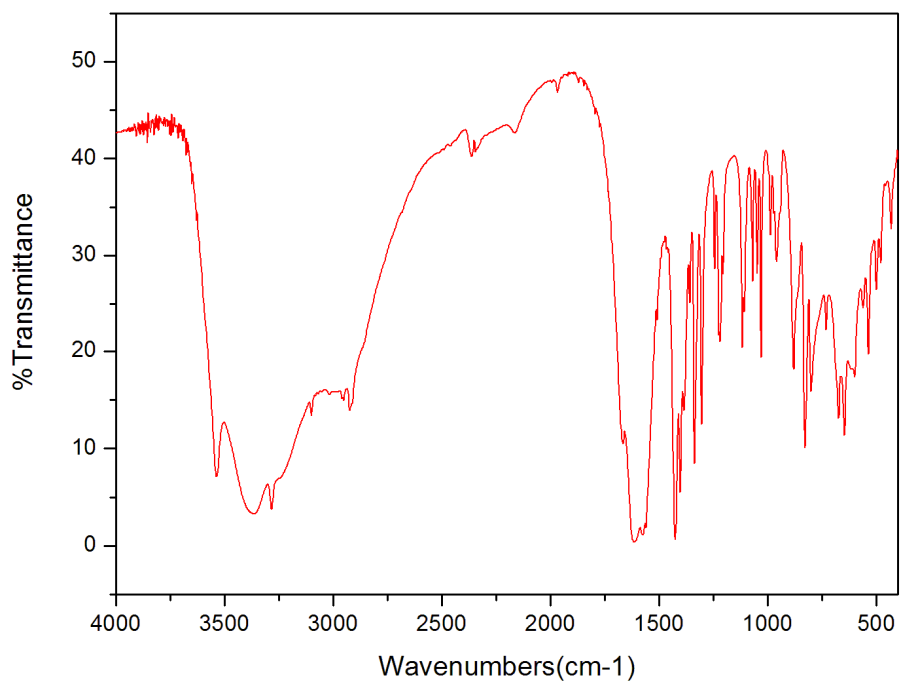

**Fig. S13.** IR spectrum of **1**.

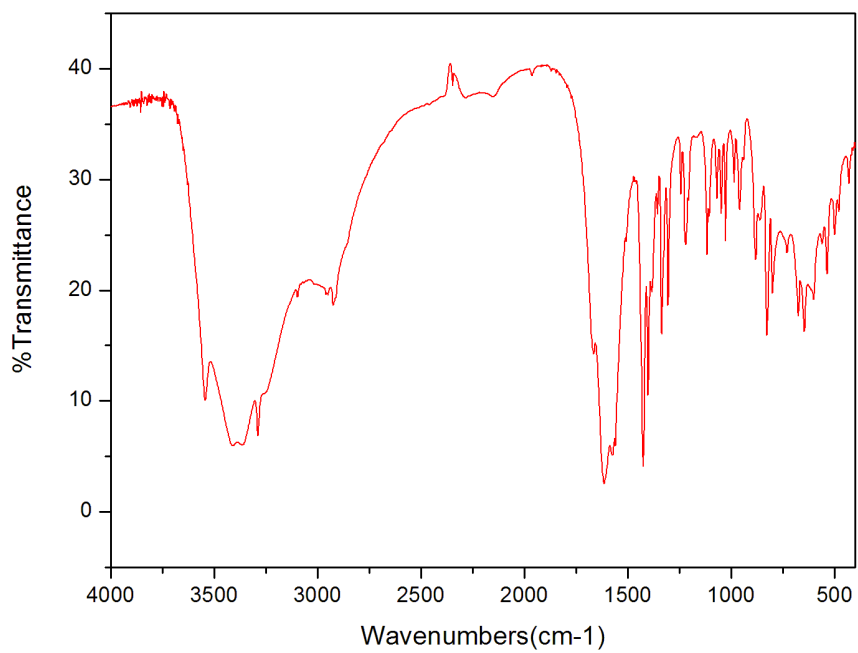

**Fig. S14.** IR spectrum of **2**.

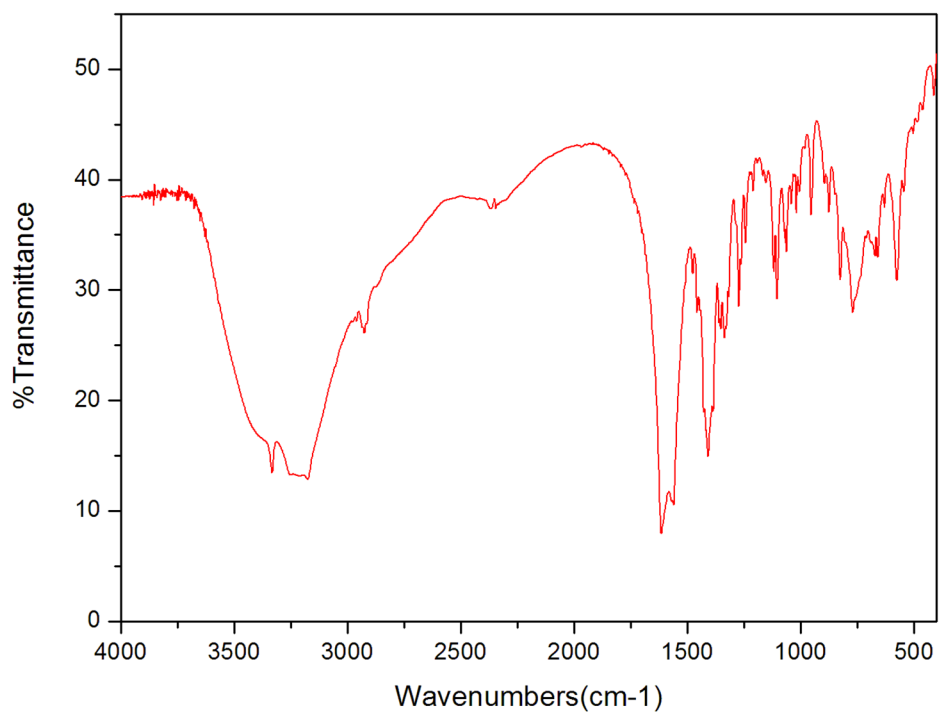

Fig. S15. IR spectrum of 3.

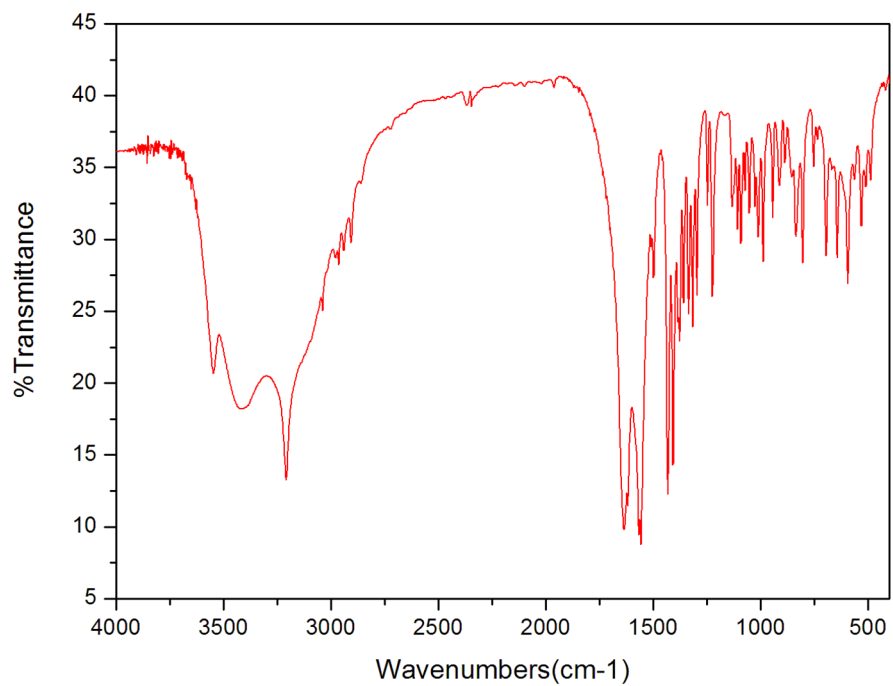

Fig. S16. IR spectrum of 4.

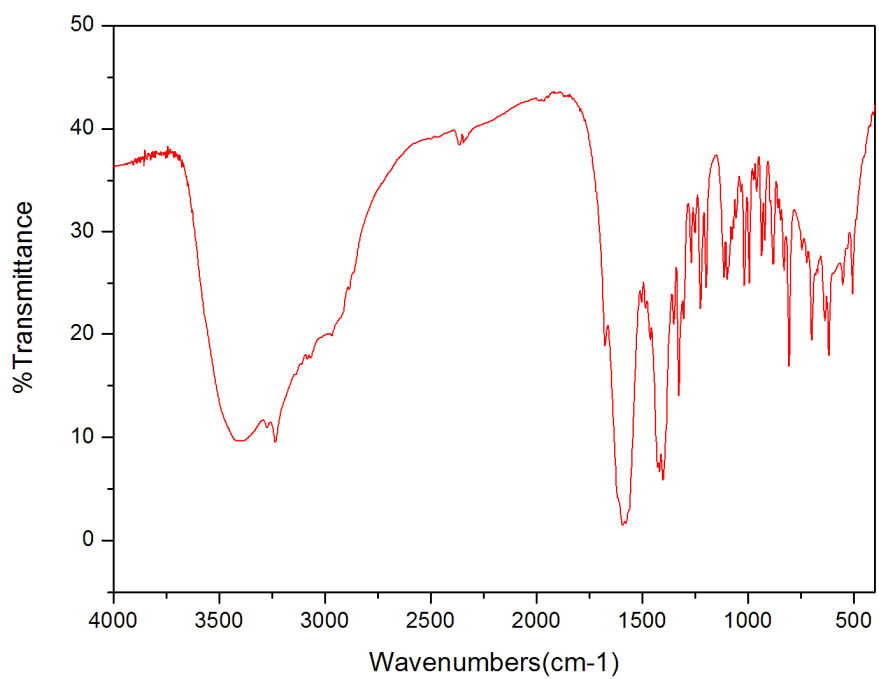

**Fig. S17.** IR spectrum of **5**.

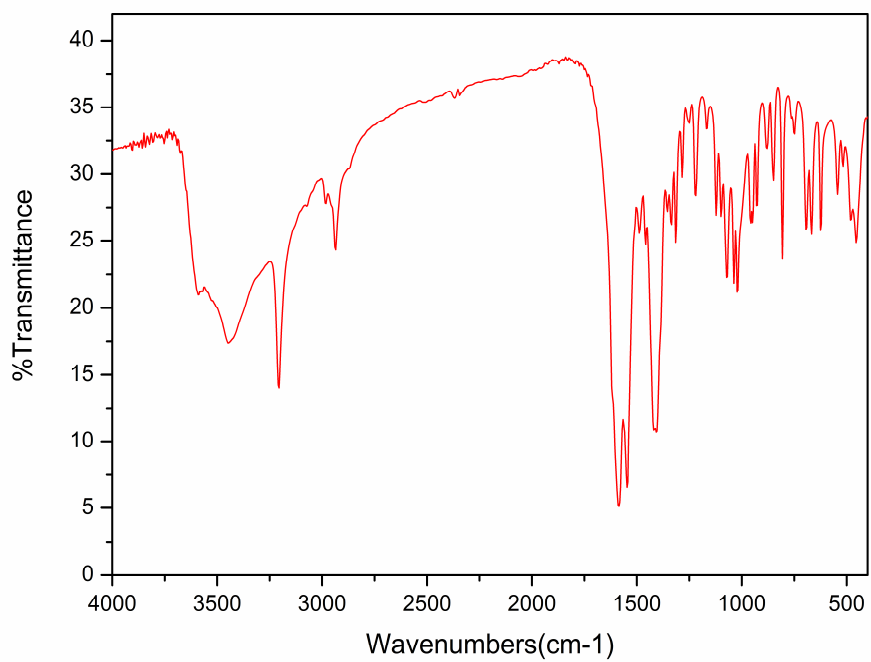

**Fig. S18.** IR spectrum of **6**.

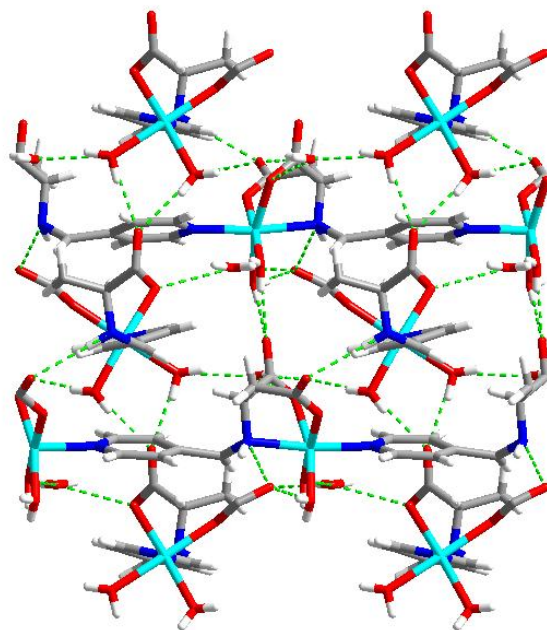

**Fig. S19.** A view of the hydrogen bondings between the 1D polymeric chains in **1** along the *b* axis.

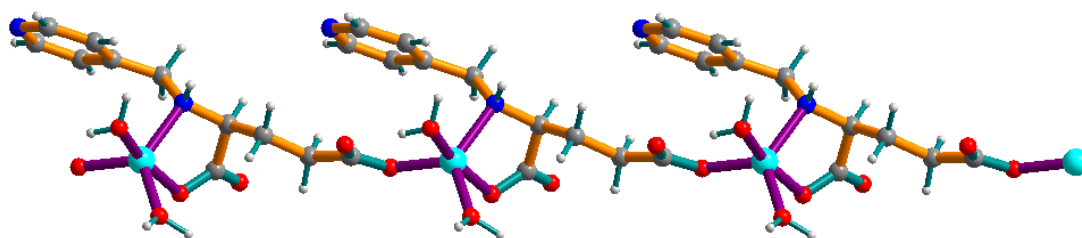

**Fig. S20.** A view of the 1D polymeric chain in **3**.

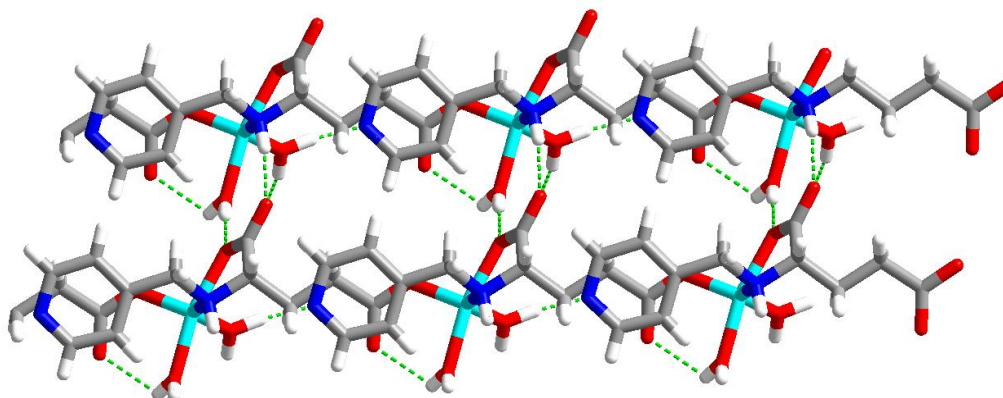

**Fig. S21.** A view of the 3D supramolecular network of compound **3** along the *b* axis (hydrogen bonds are shown in green dotted lines).

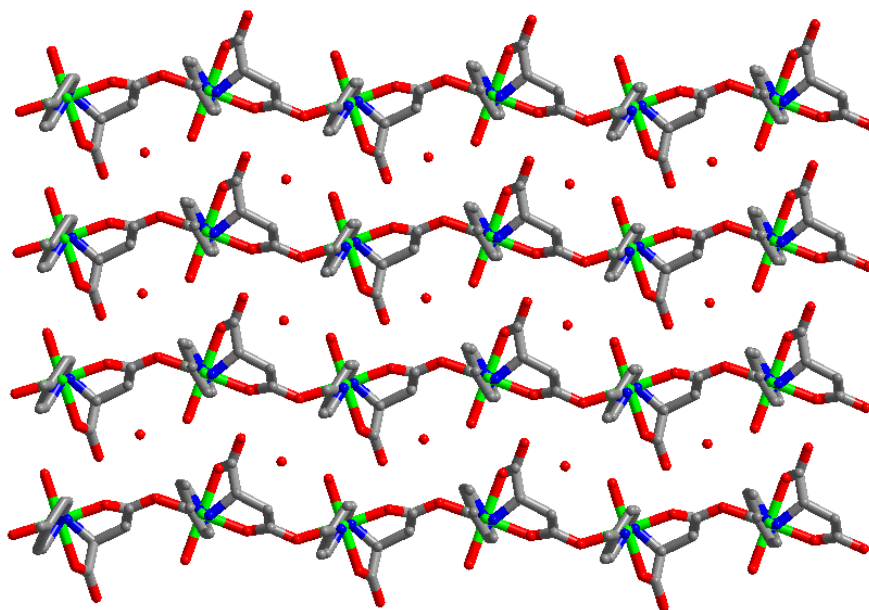

**Fig. S22.** Packing of 4 as viewed down the *c* axis.

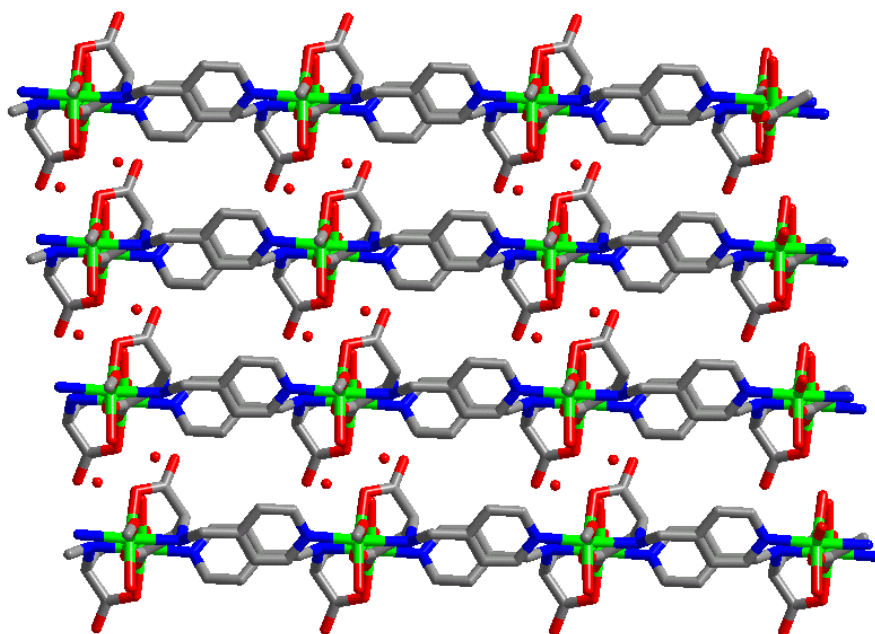

**Fig. S23.** Packing of 4 as viewed down the *b* axis.

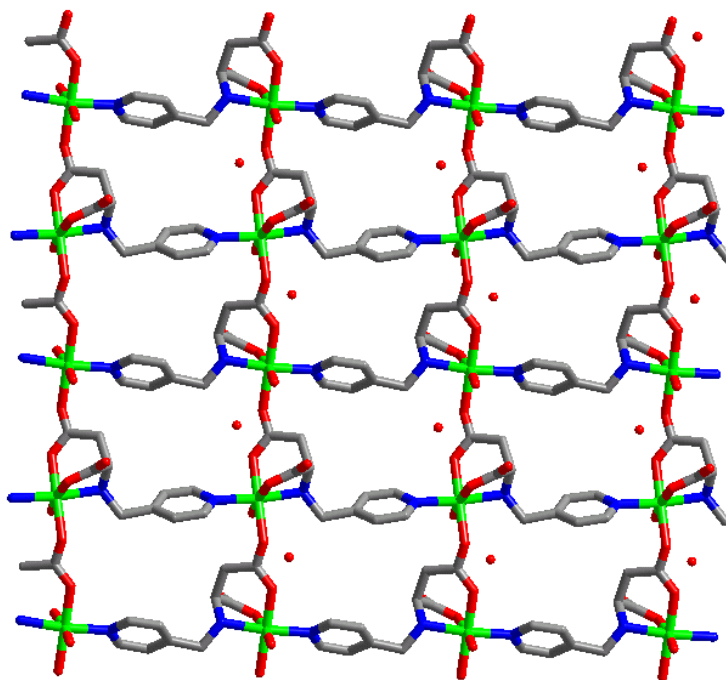

**Fig. S24.** Packing of **4** as viewed down the *a* axis.

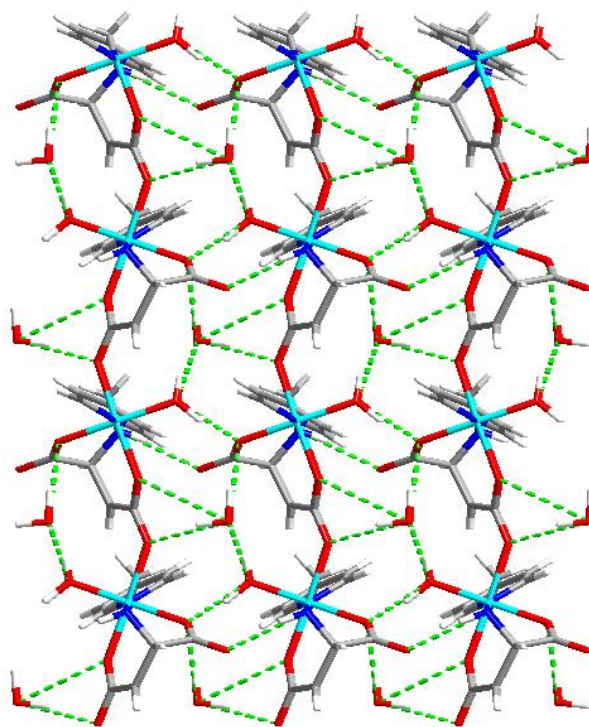

**Fig. S25.** A view of the hydrogen bonds between the 2D lattice layers of **4** along the *c* axis (hydrogen bonds are shown in green dotted lines).

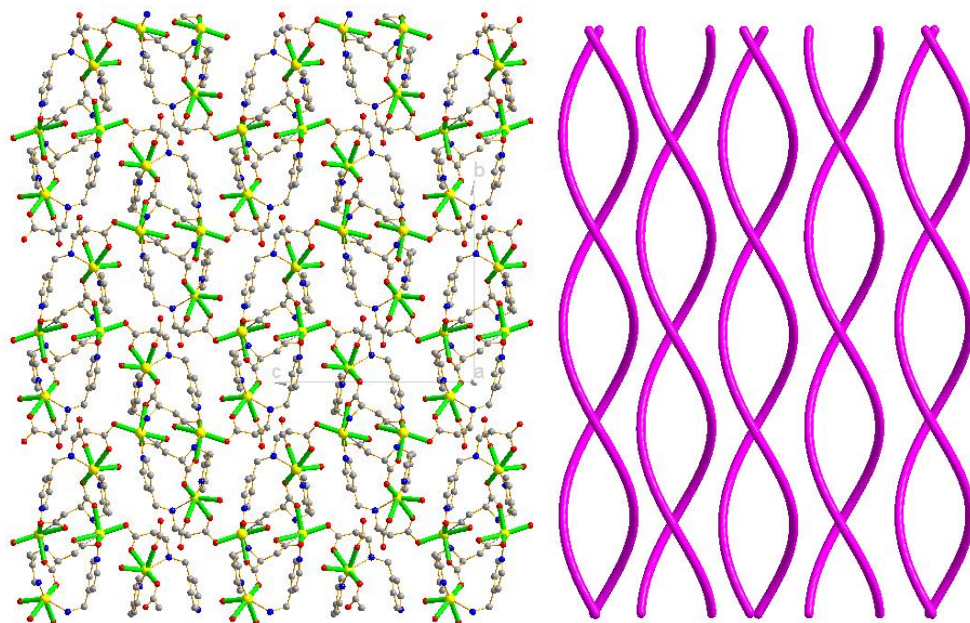

**Fig. S26.** (a) A view of the packing diagram of **5** (left). (b) Simulative double-helical chains in **5** (right).

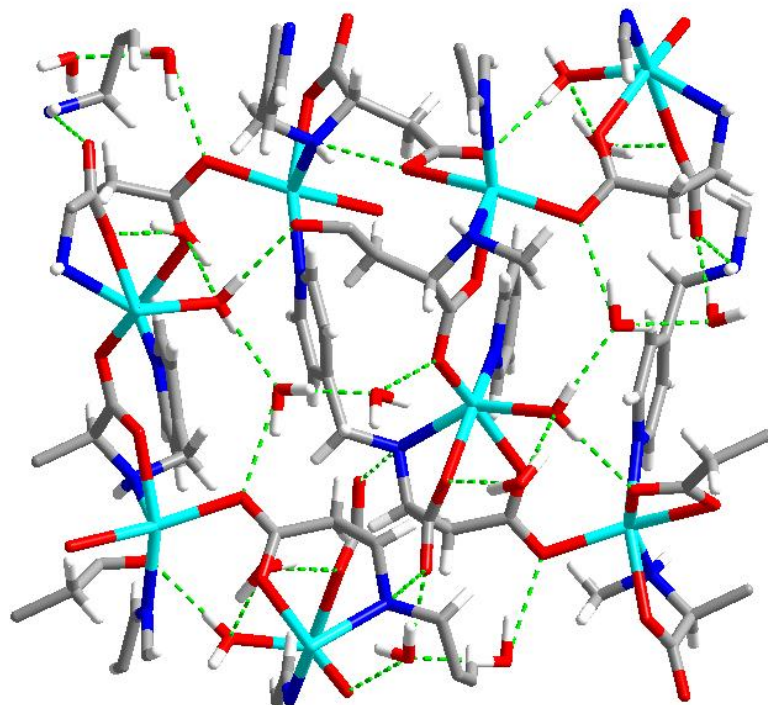

**Fig. S27.** A view of the hydrogen bonds within the 3D framework of **5** along the *a* axis (hydrogen bonds shown in green dotted lines).

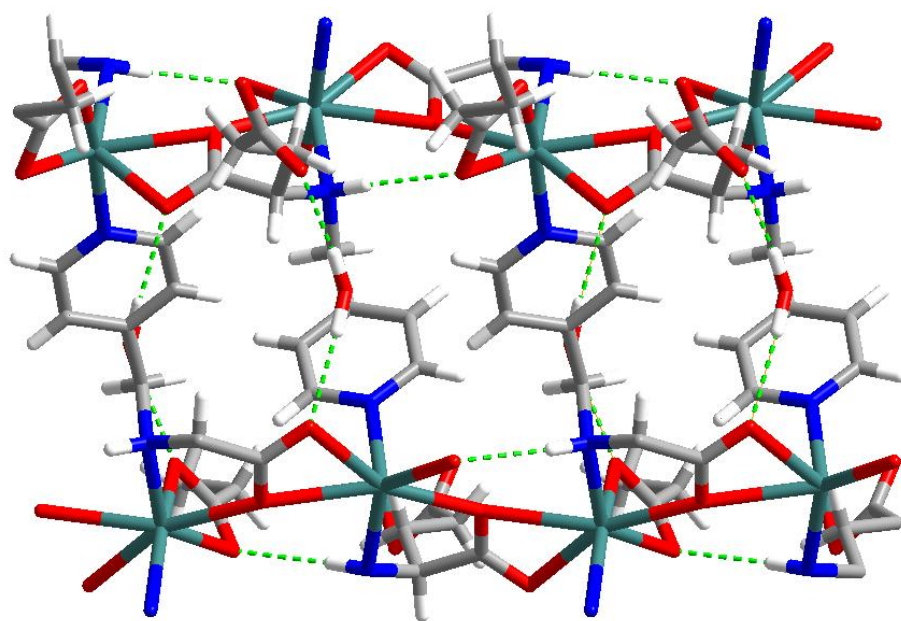

**Fig. S28.** A view of the hydrogen bonds within the 3D framework of **6** along the *a* axis (hydrogen bonds are shown in green dotted lines).
